# Supplementary material for: A new photo-switchable “on-off” host-guest system
Source: Royal Society of Chemistry journal article supplement (doi:10.1039/c1pp05055a), 2011-03-31
Supplement: c1pp05055a.pdf [file c1pp05055a.pdf]

## Electronic Supplementary Information

### A new photo-switchable “on-off” host-guest system

Youngkook Kim,<sup>a</sup> Young Ho Ko,<sup>a,b</sup> Minseon Jung,<sup>a</sup> Narayanan Selvapalam<sup>a</sup> and Kimoon Kim\*<sup>a,b</sup>

<sup>a</sup>National Creative Research Initiative Center for Smart Supramolecules (CSS) and Department of Chemistry, Pohang University of Science and Technology (POSTECH), Pohang, 790-784, Korea.

<sup>b</sup>Division of Advanced Materials Science, Pohang University of Science and Technology (POSTECH), Pohang, 790-784, Korea.

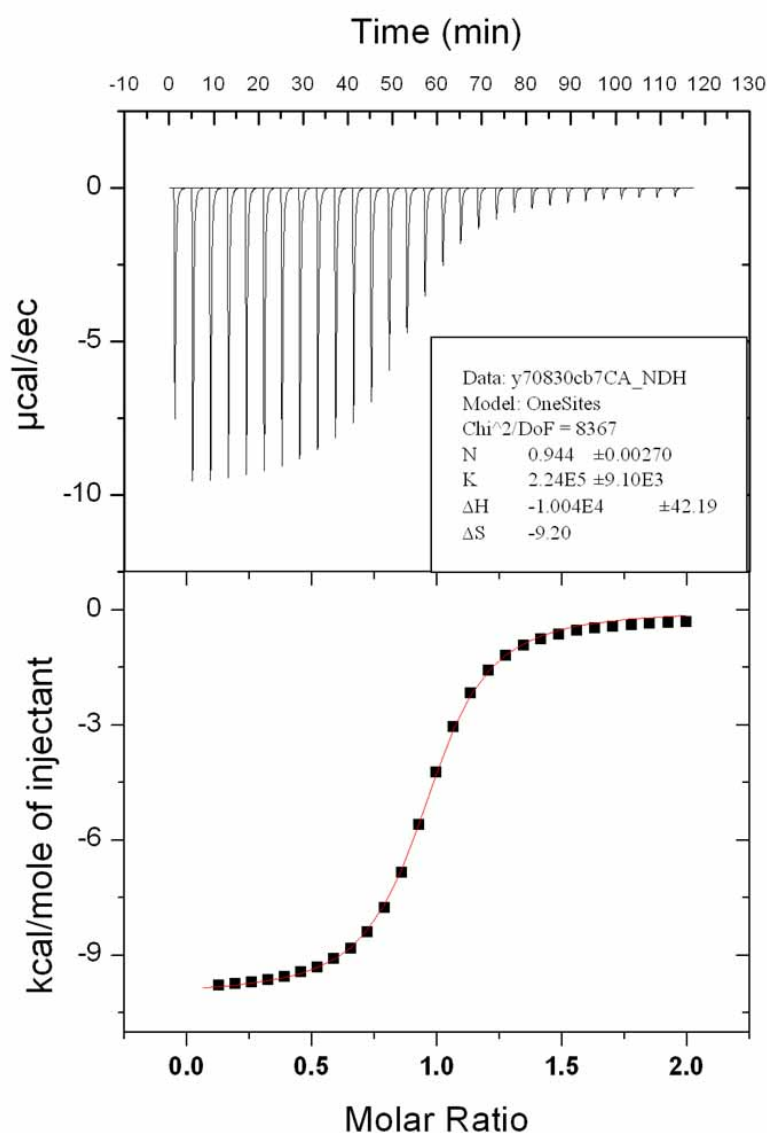

Fig. S1 ITC profile of CB[7]•(E)-cinnamamide at 298.15 K.

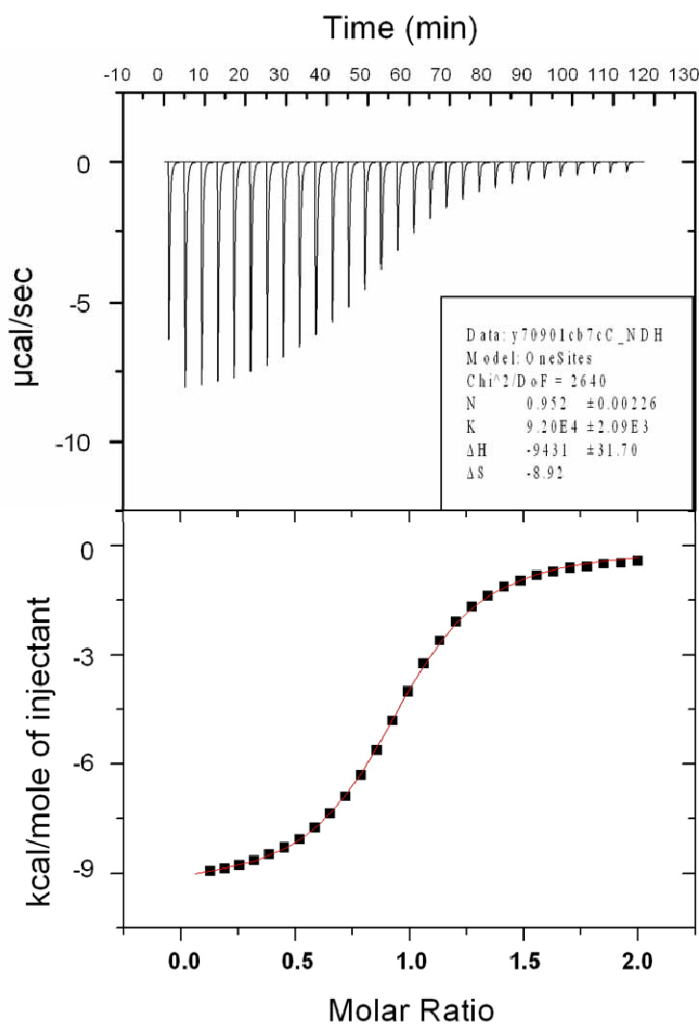

**Fig. S2** Titration curve of CB[7] with the mixture of (*Z*)-cinnamamide and (*E*)-cinnamamide (*Z* isomer:*E* isomer = 6:1) at 298.15 K.

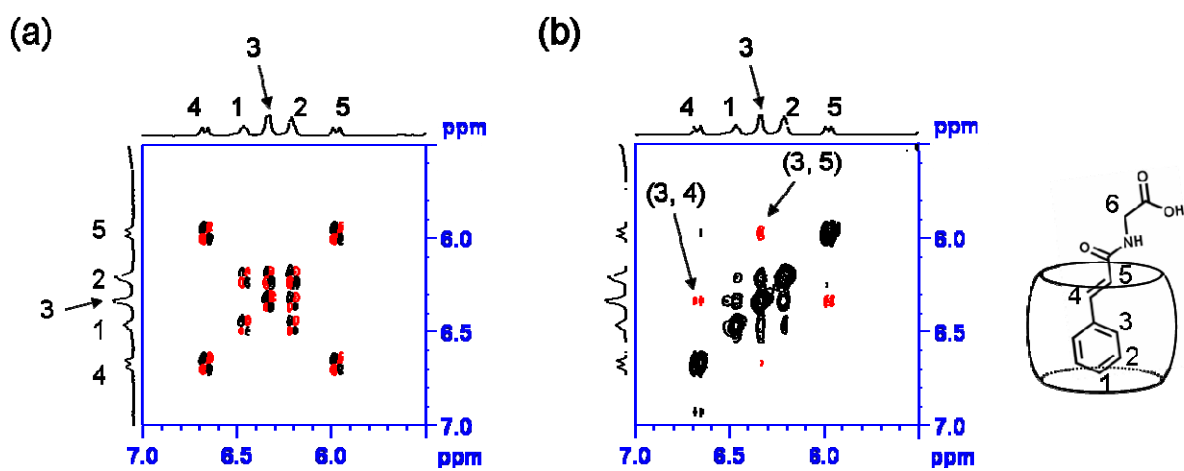

**Fig. S3** Selected region of (a) COSY and (b) ROESY NMR spectra of CB[7]•*E*-1 complex in D<sub>2</sub>O at 5 °C.

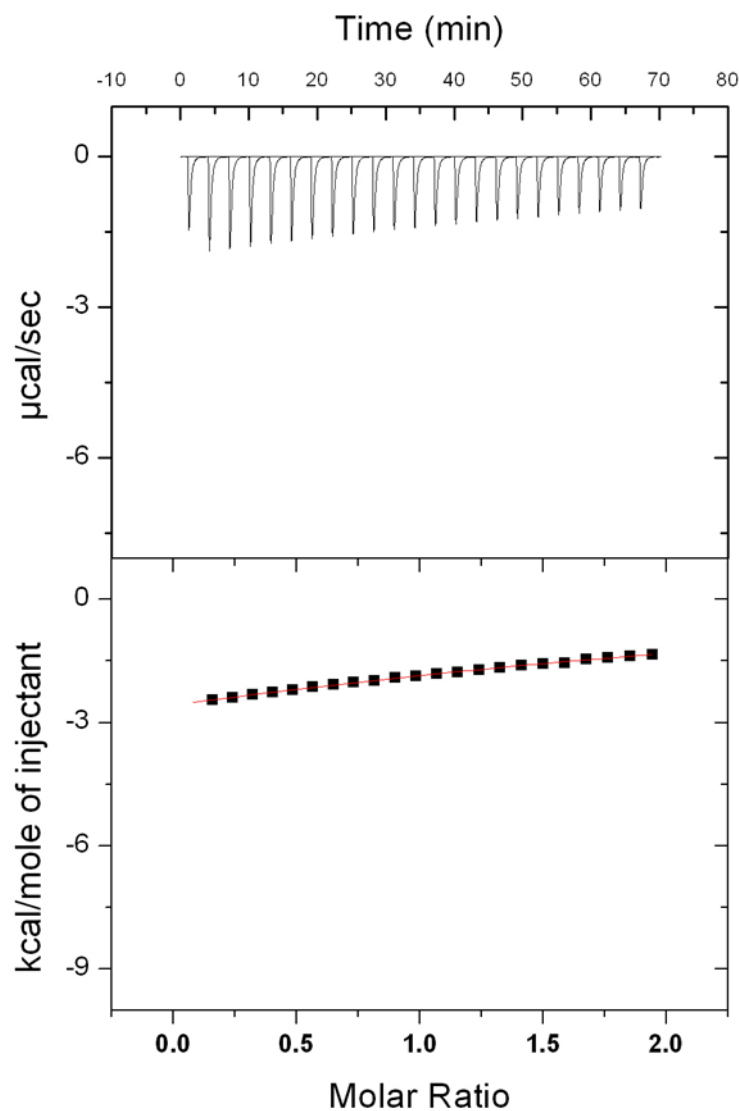

**Fig. S4** Titration curve of CB[7] with Z-1: *E*-1 (6:1) at 298.15 K.

**Table S1** The remaining percentage of *E*-1 and absorbance at 277 nm after irradiation of 300 nm-light with different exposure times (0, 50, 70, 120 and 180 sec). The absorbance of each solution was measured again after addition of 1 equiv. of CB[7].

| Irradiation time (sec)                           | 0    | 50    | 70    | 120   | 180   |
|--------------------------------------------------|------|-------|-------|-------|-------|
| <i>E</i> -1 (%) <sup>a</sup>                     | 100  | 74.6  | 41.9  | 25.9  | 16.0  |
| Abs. at 277 nm                                   | 1.12 | 0.943 | 0.635 | 0.514 | 0.449 |
| Abs. at 277 nm (after addition of 1 equiv CB[7]) | 1.09 | 0.886 | 0.654 | 0.510 | 0.444 |

<sup>a</sup> The remaining percentage of *E*-1 of each solution was calculated by integration of <sup>1</sup>H NMR signals.

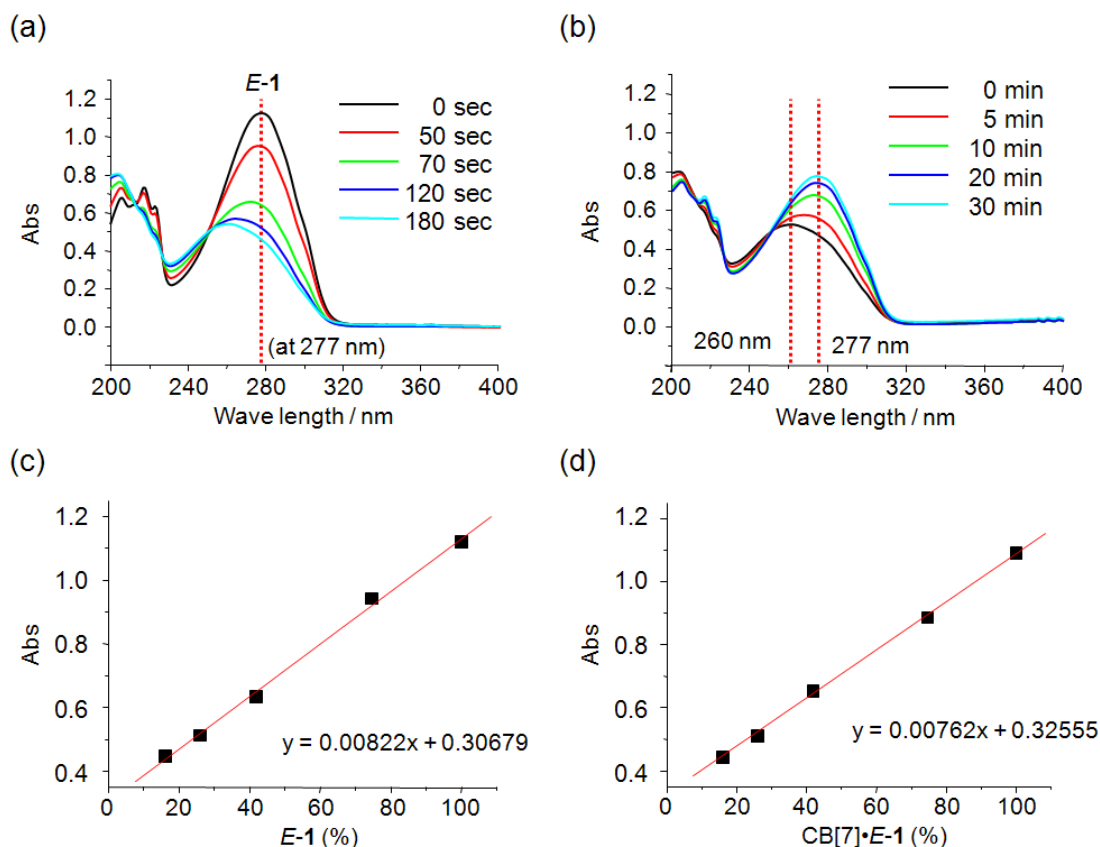

**Fig. S5** Changes in the UV-Vis absorption spectra of (a) *E-1* upon 300 nm irradiation, (b) *Z-1:E-1 = 6:1* mixture upon 254 nm irradiation, with time. Calibration curve for (c) *E-1*, and (d) *CB[7]•E-1* plotted using the values in **Table S1**.

**Table S2** The absorbance of solutions of *E-1* and *CB[7]•E-1* at 277 nm and remaining percentage of *E-1* and *CB[7]•E-1* upon alternating irradiation of 300 nm (3 min) and 254 nm (30 min).

| Irradiation wavelength (nm)                              | -    | 300   | 254   | 300   | 254   | 300   | 254   | 300   |
|----------------------------------------------------------|------|-------|-------|-------|-------|-------|-------|-------|
| Abs. at 277 nm                                           | 1.12 | 0.438 | 0.833 | 0.439 | 0.825 | 0.446 | 0.773 | 0.428 |
| <i>E-1</i> (%)                                           | 100  | 16    | 64    | 16    | 63    | 17    | 57    | 15    |
| Abs. at 277 nm (after addition of 1 equiv <i>CB[7]</i> ) | 1.09 | 0.455 | 0.920 | 0.463 | 0.889 | 0.447 | 0.897 | 0.463 |
| <i>CB[7]•E-1</i> (%)                                     | 100  | 17    | 78    | 18    | 74    | 16    | 75    | 18    |
